# Supplementary material for: Cortical microstructural changes associated with treated aphasia recovery
Source: PubMed Central journal article supplement — Ann Clin Transl Neurol. 2021 Aug 18;8(9):1884–94. doi: 10.1002/acn3.51445 (PMC8419405; doi:10.1002/acn3.51445), 2021-08-18
Supplement: ACN3-8-1884-s001.pdf [file ACN3-8-1884-s001.pdf]

## Supplementary Material

For the manuscript:

Cortical microstructural changes associated with treated aphasia recovery

Authors:

Allen J. Chang\*, Janina Wilmskoetter\*, Julius Fridriksson, Emilie T. McKinnon, Lorelei P. Johnson, Alexandra Basilakos, Jens H. Jensen, Chris Rorden, Leonardo Bonilha

\* *These authors contributed equally to the work*

---

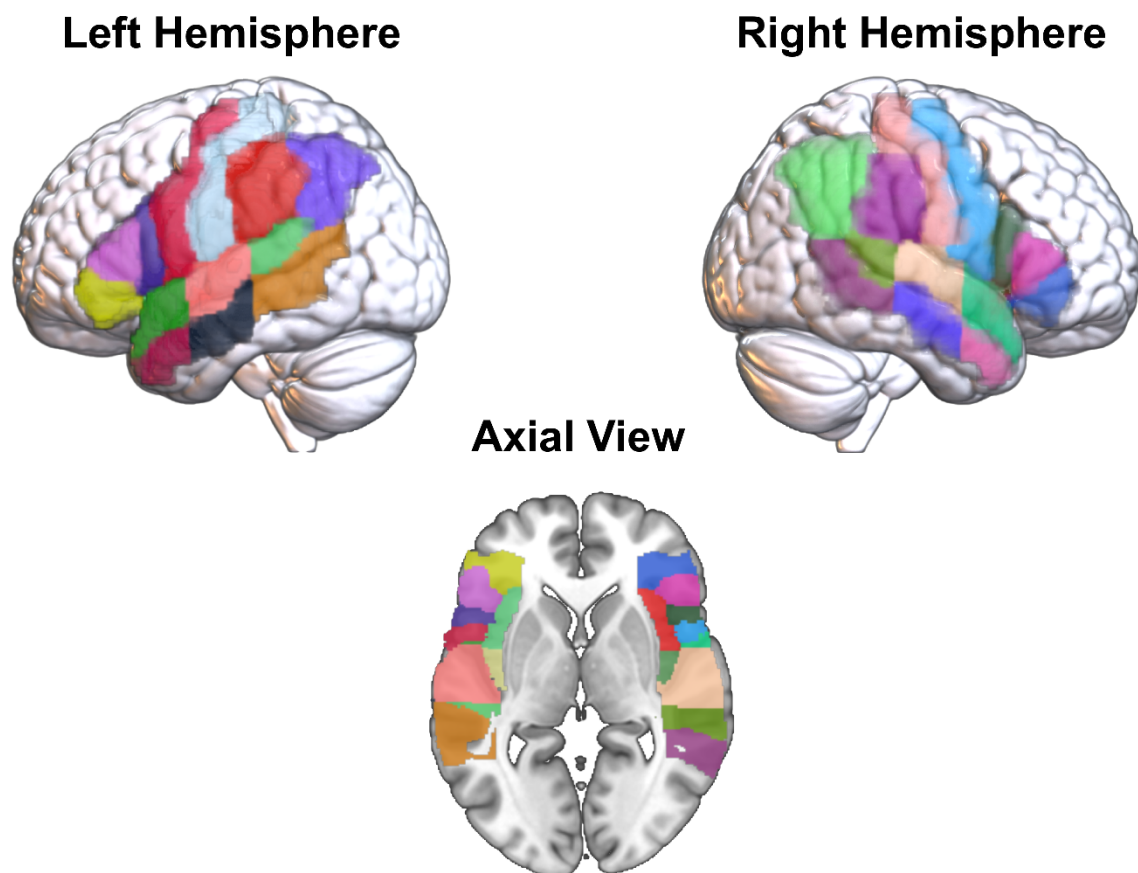

*Supplementary Figure 1: Thirty regions of interests defined by the Johns Hopkins University. Regions of interests are associated with the ventral and dorsal stream of language and its right hemisphere homologous structures.*

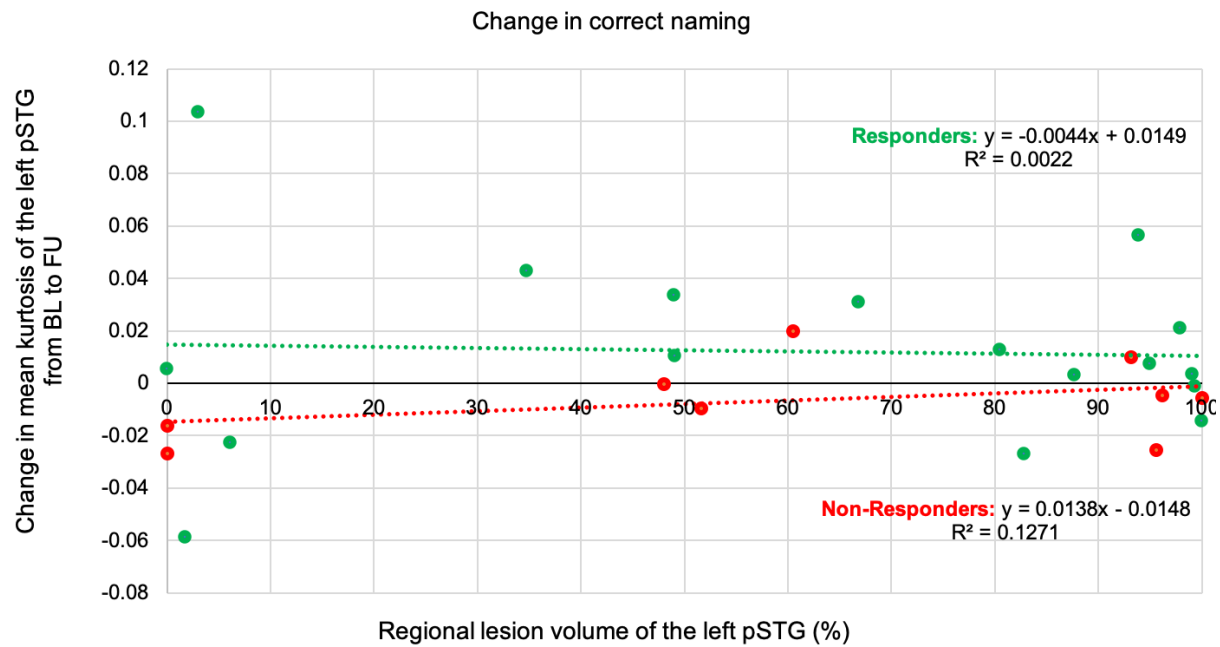

*Supplementary Figure 2: Relationship between change in mean kurtosis from baseline to one week after treatment and lesion volume in the posterior superior temporal gyrus (pSTG) for responders (colored in green; participants who produced more correct responses after treatment compared to baseline) and non-responders (colored in red; participants who produced less or equal number of correct responses after treatment compared to baseline).*

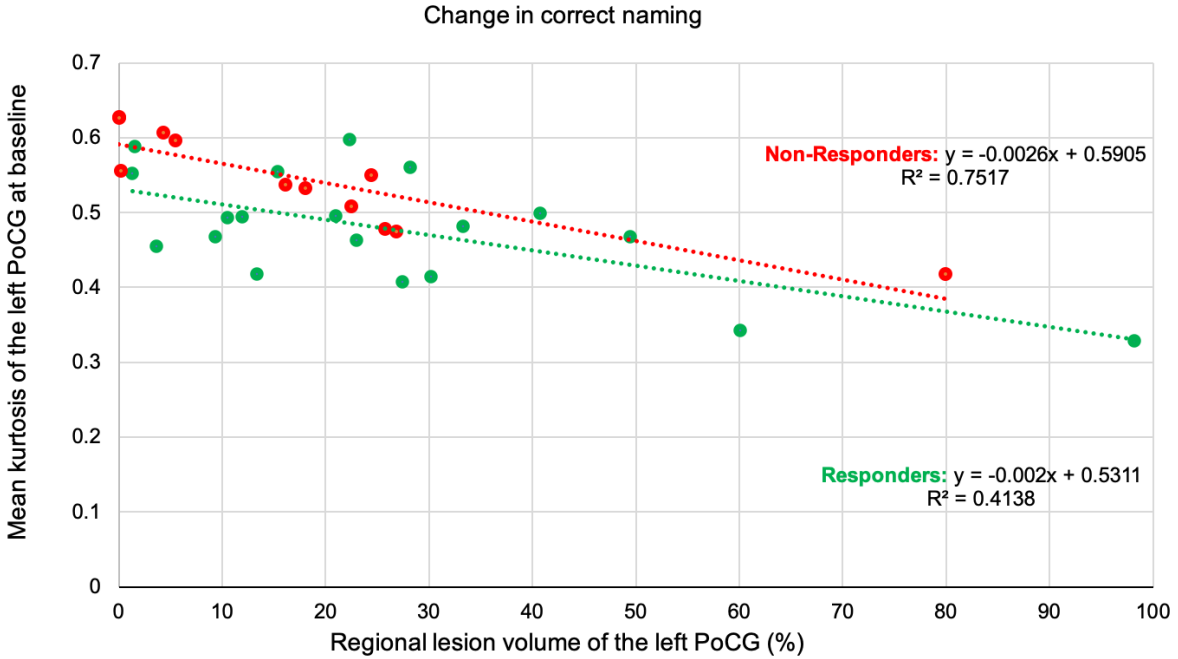

*Supplementary Figure 3: Relationship between mean kurtosis at baseline and lesion volume in the precentral gyrus (PoCG) for responders (colored in green; participants who produced more correct responses after treatment compared to baseline) and non-responders (colored in red; participants who produced less or equal number of correct responses after treatment compared to baseline).*

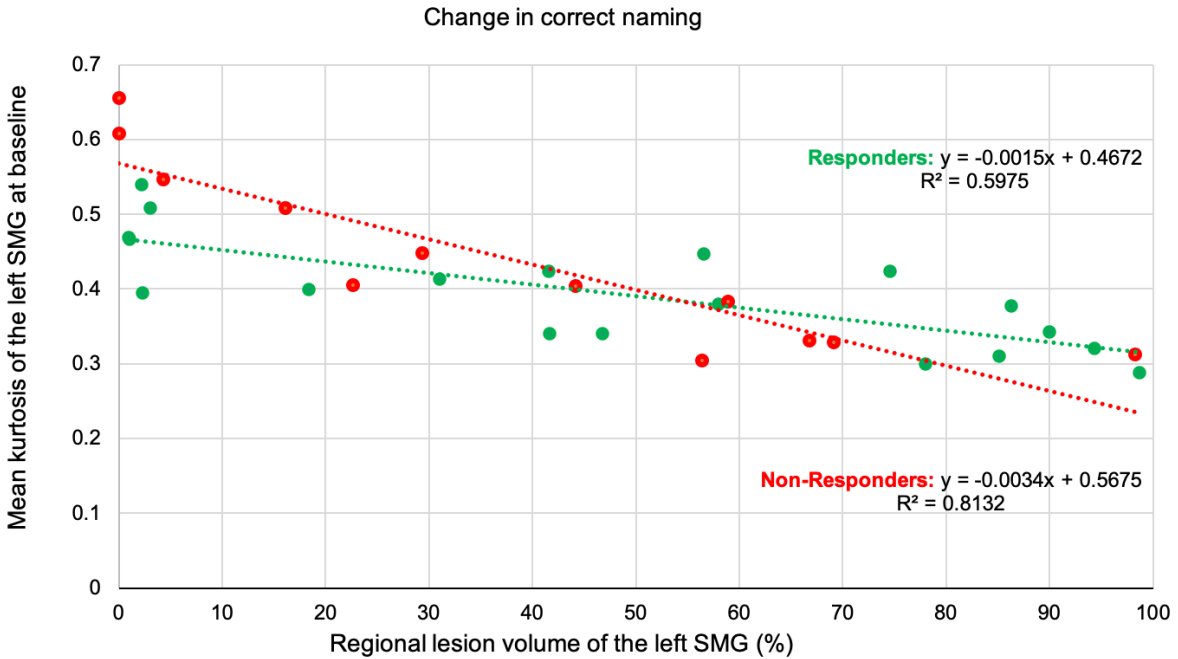

*Supplementary Figure 4: Relationship between mean kurtosis at baseline and lesion volume in the supramarginal gyrus (SMG) for responders (colored in green; participants who produced more correct responses after treatment compared to baseline) and non-responders (colored in red; participants who produced less or equal number of correct responses after treatment compared to baseline).*

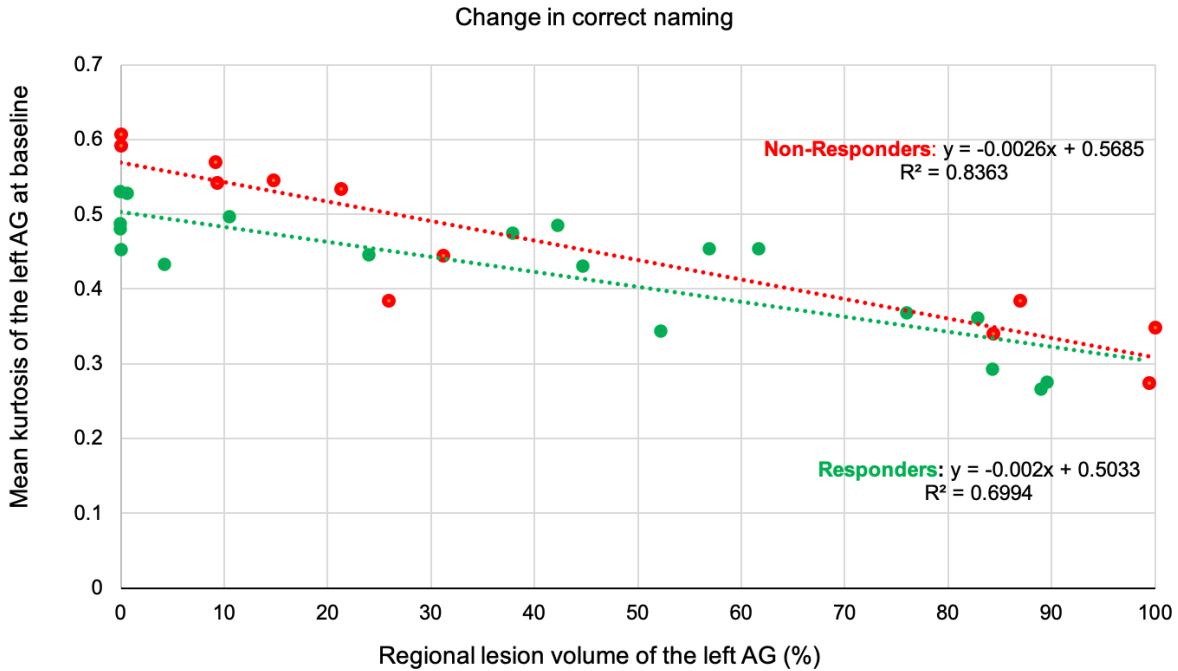

*Supplementary Figure 5: Relationship between mean kurtosis at baseline and lesion volume in the angular gyrus (AG) for responders (colored in green; participants who produced more correct responses after treatment compared to baseline) and non-responders (colored in red; participants who produced less or equal number of correct responses after treatment compared to baseline).*

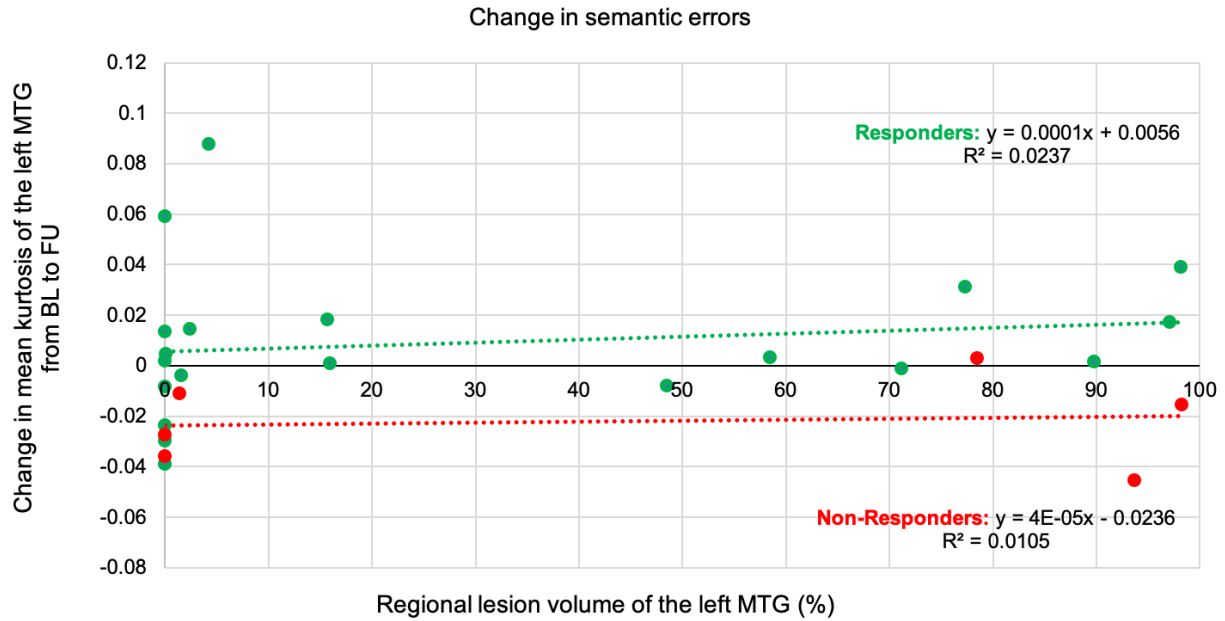

*Supplementary Figure 6: Relationship between change in mean kurtosis from baseline to one week after treatment and lesion volume in the middle temporal gyrus (MTG) for responders (colored in green; participants who produced less semantic errors after treatment compared to baseline) and non-responders (colored in red; participants who produced more or equal number of semantic errors after treatment compared to baseline).*

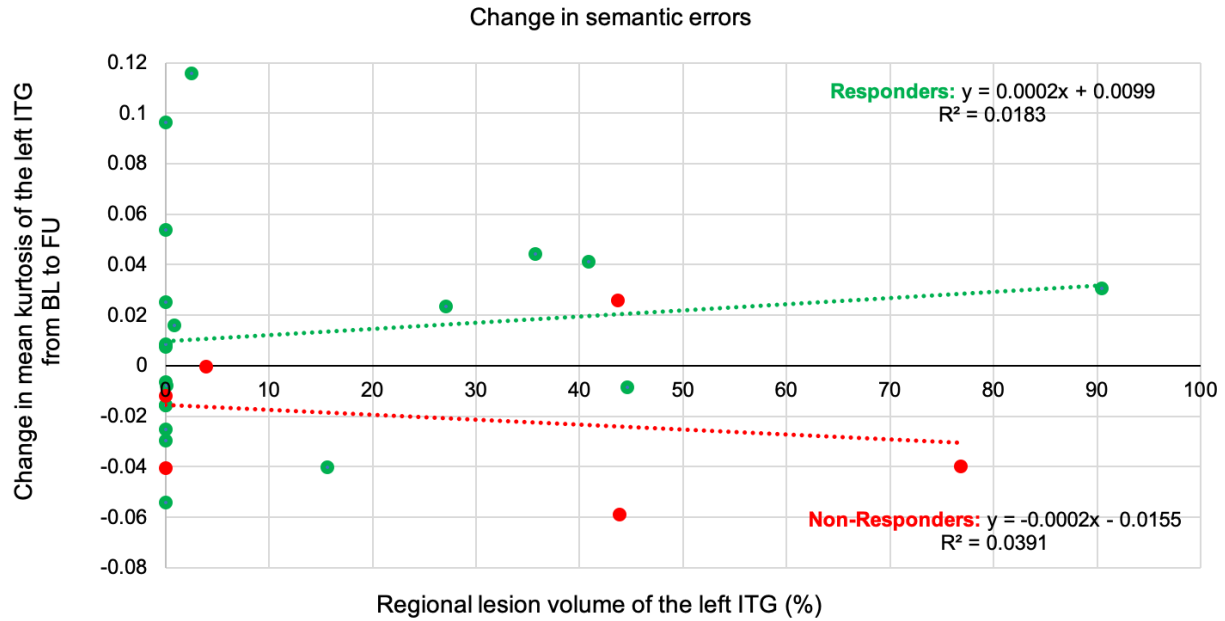

*Supplementary Figure 7: Relationship between change in mean kurtosis from baseline to one week after treatment and lesion volume in the inferior temporal gyrus (ITG) for responders (colored in green; participants who produced less semantic errors after treatment compared to baseline) and non-responders (colored in red; participants who produced more or equal number of semantic errors after treatment compared to baseline).*

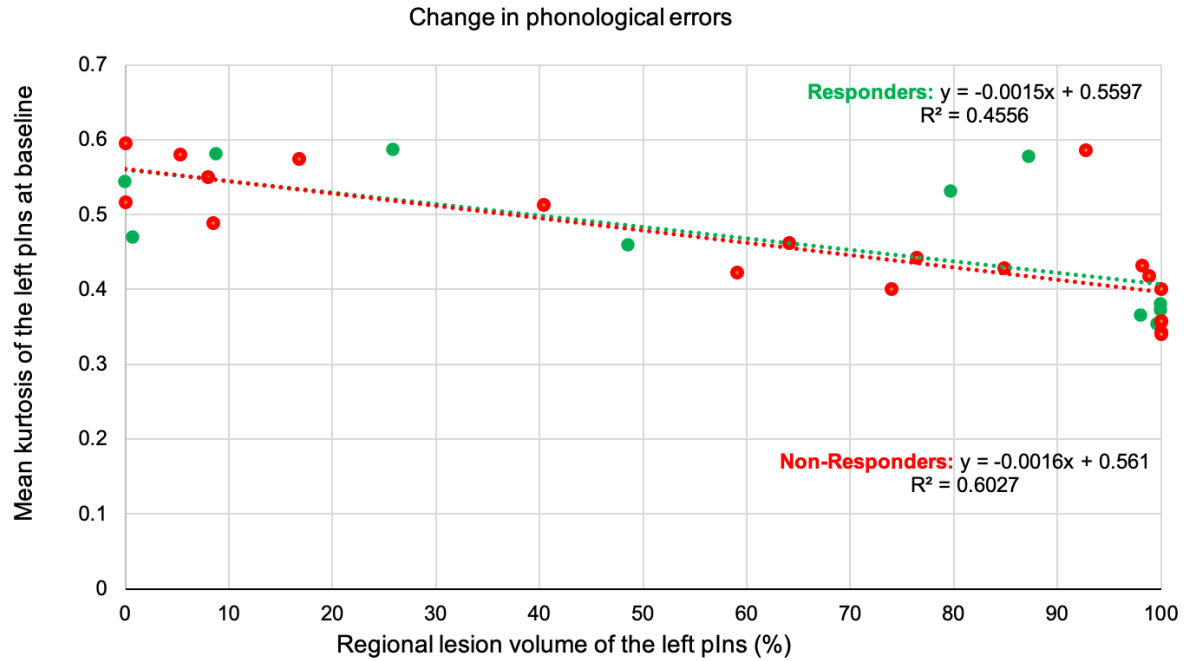

*Supplementary Figure 8: Relationship between change in mean kurtosis from baseline to one week after treatment and lesion volume in the posterior insula (plns) for responders (colored in green; participants who produced less phonological errors after treatment compared to baseline) and non-responders (colored in red; participants who produced more or equal number of phonological errors after treatment compared to baseline).*
